# Supplementary material
Source: publisher figshare collection journal article supplement (https://tandf.figshare.com/ndownloader/files/20999724)
Supplement: Supplementary file 1 [file 20999724]

**Supporting Information**

Efficient removal of carcinogenic azo dyes by novel pyrazine-2-carboxylate substituted

calix[4, 8]arene derivatives

Ömer Güngör

*University of Kocaeli, Advanced Vacational School of Hereke Omer Ismet Uzunyol,* Department of Chemistry Technology, *Kocaeli, Turkey*

*Corresponding author e-mail: omer.gungor@kocaeli.edu.tr

**Contents**

| Figure S1. Mass spectrum of the compound 3. | S2 |
| --- | --- |
| Figure S2. Mass spectrum of the compound 6. | S2 |
| Figure S3. H-NMR spectrum of the compound 3. | S3 |
| Figure S3. H-NMR spectrum of the compound 6. | S3 |

**
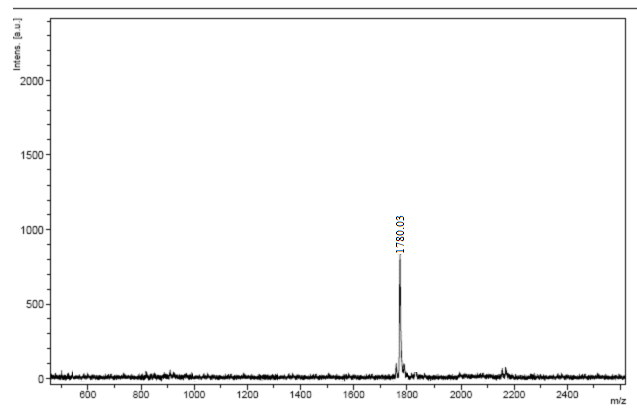
**

**Figure S1.** Mass spectrum of the compound **3.**

**
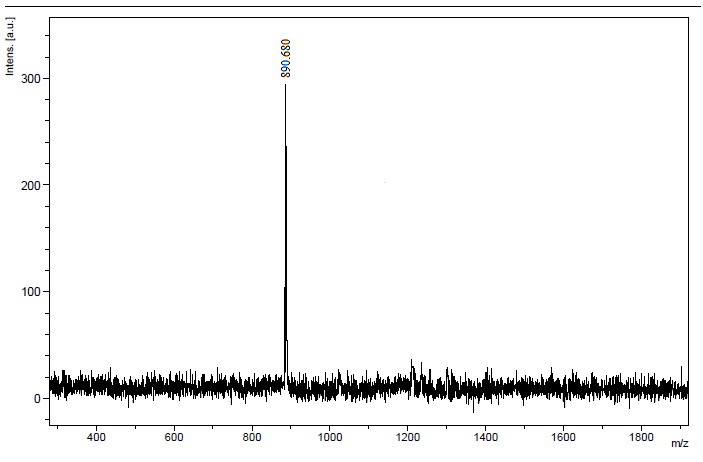
**

**Figure S2.** Mass spectrum of the compound **6.**

**
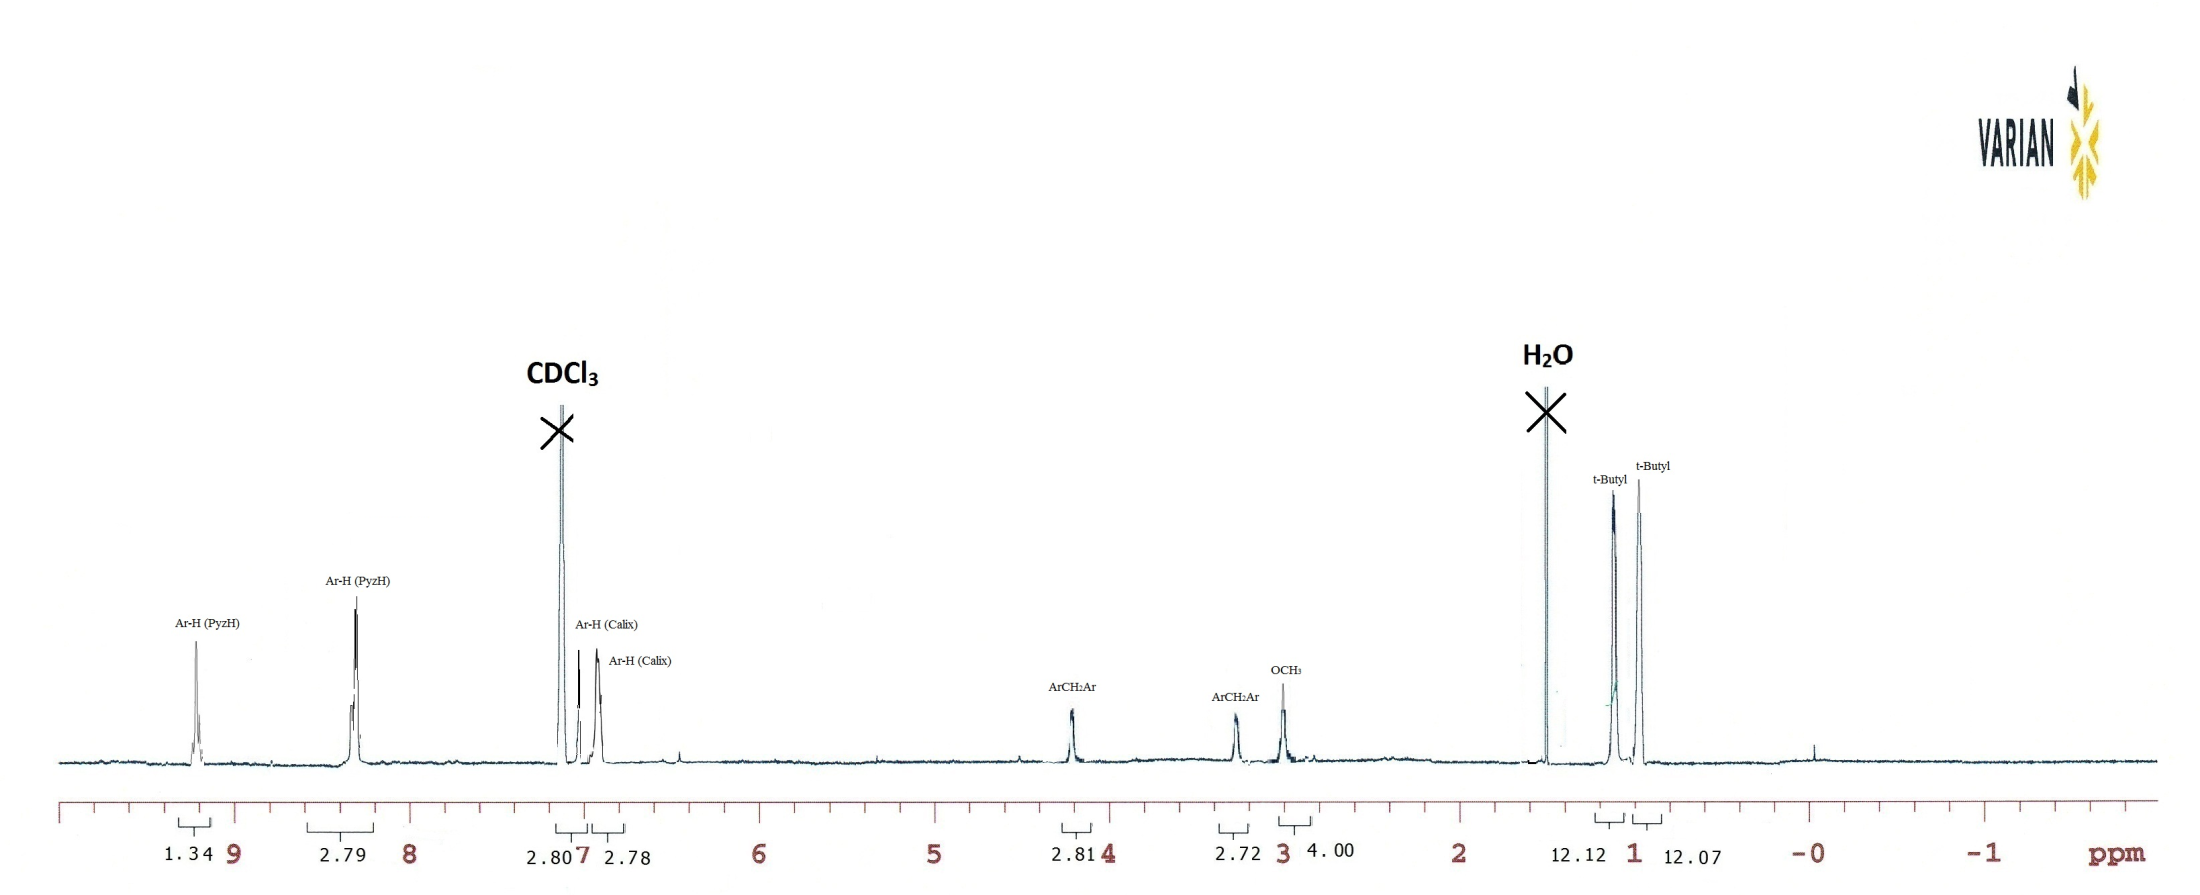
**

**Figure S3.** H-NMR spectrum of the compound **3.**

**
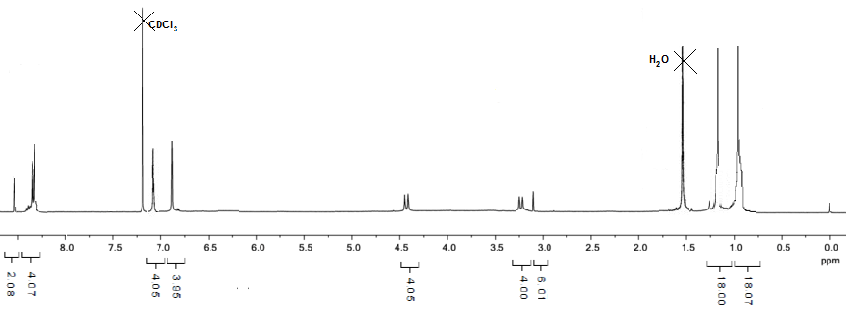
**

**Figure S4.** H-NMR spectrum of the compound **6.**
